# Supplementary material for: The Pitaya Flower Tissue’s Gene Differential Expression Analysis between Self-Incompatible and Self-Compatible Varieties for the Identification of Genes Involved in Self-Incompatibility Regulation
Source: MDPI journal article supplement (doi:10.3390/ijms241411406), 2023-07-13
Supplement: s1 [file s1]

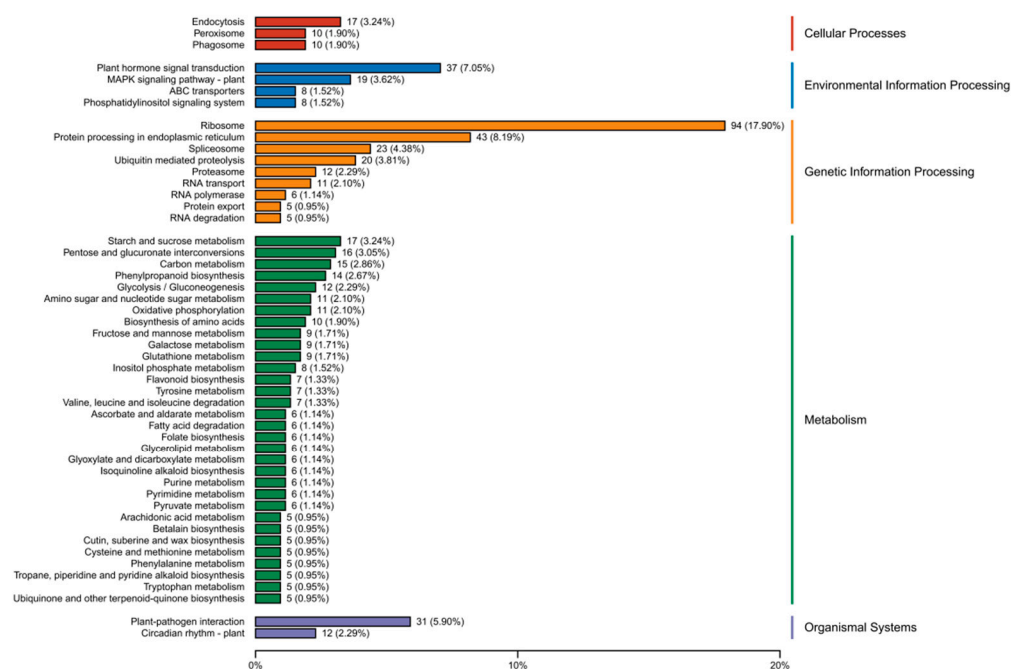

Figure S1 Annotation of gene KEGG pathway in K8. Y-axis: KEGG pathway terms; X-axis: Number and the percentage of genes annotated to the KEGG pathway.
