# Supplementary material for: The Pitaya Flower Tissue’s Gene Differential Expression Analysis between Self-Incompatible and Self-Compatible Varieties for the Identification of Genes Involved in Self-Incompatibility Regulation
Source: Int J Mol Sci. 2023 Jul 13;24(14):11406. doi: 10.3390/ijms241411406 (PMC10379629; doi:10.3390/ijms241411406)
Supplement: Supplementary file 1 [file ijms-24-11406-s001.zip]

Archive with 9 entries (9 files):
- Figure S1 Annotation of gene KEGG pathway in K8.pdf
- Figure S2 Conserved region of S-RNase2.pdf
- Table S1 Viral contamination in samples.xlsx
- Table S2 Viral contamination in samples.xlsx
- Table S3 Sequence comparison results of sample data and reference genome.xlsx
- Table S4 Statistics on the number of AS events.xlsx
- Table S5 DEGs in module mediumpurple3.xlsx
- Table S6 Sample collection.xlsx
- Table S7 Primer sequences for RT-qPCR.xlsx
