# Supplementary material for: The Pitaya Flower Tissue’s Gene Differential Expression Analysis between Self-Incompatible and Self-Compatible Varieties for the Identification of Genes Involved in Self-Incompatibility Regulation
Source: Int J Mol Sci. 2023 Jul 13;24(14):11406. doi: 10.3390/ijms241411406 (PMC10379629; doi:10.3390/ijms241411406)
Supplement: Supplementary file 1 [file ijms-24-11406-s001.zip › Table S1 Viral contamination in samples.xlsx]

## Sheet: Sheet1
Table S1 Viral contamination in samples
sample	Species comparison information
Unknown_AV707-01T0001	[virus](taxid:253700)Schlumbergera virus:53.74
	[virus](taxid:112227)Cactus virus:19.81
	[plant](taxid:3555)Beta vulgaris:3.79
	[plant](taxid:63459)Chenopodium quinoa:2.94
	[plant](taxid:3562)Spinacia oleracea:1.8
	[plant](taxid:1195597)Hylocereus polyrhizus:1.23
	Other:16.4
Unknown_AV707-01T0002	[virus](taxid:253700)Schlumbergera virus:46.37
	[virus](taxid:112227)Cactus virus:28.21
	[plant](taxid:63459)Chenopodium quinoa:3.29
	[plant](taxid:3555)Beta vulgaris:2.7
	[virus](taxid:1176736)Pitaya virus:2.62
	[virus](taxid:2480180)Mytcor virus:1.6
	[plant](taxid:3562)Spinacia oleracea:1.52
	Other:13.46
Unknown_AV707-01T0003	[virus](taxid:253700)Schlumbergera virus:59.29
	[virus](taxid:112227)Cactus virus:18.42
	[plant](taxid:63459)Chenopodium quinoa:2.69
	[virus](taxid:253701)Zygocactus virus:2.61
	[virus](taxid:1176736)Pitaya virus:2.53
	[plant](taxid:3562)Spinacia oleracea:1.66
	[plant](taxid:3555)Beta vulgaris:1.66
	[virus](taxid:2480180)Mytcor virus:1.19
	Other:10.07
Unknown_AV707-01T0004	[virus](taxid:112227)Cactus virus:56.37
	[virus](taxid:253700)Schlumbergera virus:7.47
	[plant](taxid:63459)Chenopodium quinoa:5.16
	[plant](taxid:3555)Beta vulgaris:4.73
	[plant](taxid:3562)Spinacia oleracea:2.75
	[plant](taxid:1195597)Hylocereus polyrhizus:1.43
	Other:22.11
Unknown_AV707-01T0005	[virus](taxid:112227)Cactus virus:54.79
	[virus](taxid:253700)Schlumbergera virus:12.81
	[virus](taxid:1176736)Pitaya virus:3.88
	[virus](taxid:253701)Zygocactus virus:3.44
	[plant](taxid:3555)Beta vulgaris:3.12
	[plant](taxid:63459)Chenopodium quinoa:2.8
	[plant](taxid:3562)Spinacia oleracea:1.61
	[virus](taxid:253702)Opuntia virus:1.29
	Other:16.42
Unknown_AV707-01T0006	[virus](taxid:253700)Schlumbergera virus:75.48
	[virus](taxid:112227)Cactus virus:13.22
	[virus](taxid:253701)Zygocactus virus:1.73
	[plant](taxid:63459)Chenopodium quinoa:1.53
	Other:8.14
Unknown_AV707-01T0007	[virus](taxid:253700)Schlumbergera virus:72.13
	[virus](taxid:112227)Cactus virus:12.82
	[virus](taxid:253701)Zygocactus virus:3.87
	[plant](taxid:63459)Chenopodium quinoa:1.65
	[plant](taxid:3555)Beta vulgaris:1.58
	Other:7.83
Unknown_AV707-01T0008	[virus](taxid:253700)Schlumbergera virus:66.27
	[virus](taxid:112227)Cactus virus:18.49
	[virus](taxid:253701)Zygocactus virus:2.66
	[plant](taxid:3555)Beta vulgaris:1.63
	[plant](taxid:63459)Chenopodium quinoa:1.41
	[virus](taxid:1176736)Pitaya virus:1.26
	Other:8.15000000000001
Unknown_AV707-01T0009	[virus](taxid:253700)Schlumbergera virus:64.79
	[virus](taxid:112227)Cactus virus:13.4
	[plant](taxid:63459)Chenopodium quinoa:3.57
	[virus](taxid:253701)Zygocactus virus:2.78
	[virus](taxid:1176736)Pitaya virus:1.98
	[plant](taxid:3555)Beta vulgaris:1.51
	[plant](taxid:3562)Spinacia oleracea:1.51
	Other:10.55
Unknown_AV707-01T0010	[virus](taxid:112227)Cactus virus:81.17
	[virus](taxid:1176736)Pitaya virus:4.26
	[plant](taxid:63459)Chenopodium quinoa:1.8
	[plant](taxid:3555)Beta vulgaris:1.52
	[plant](taxid:3562)Spinacia oleracea:1.01
	Other:10.07
Unknown_AV707-01T0011	[virus](taxid:112227)Cactus virus:70.43
	[virus](taxid:1176736)Pitaya virus:10.27
	[plant](taxid:63459)Chenopodium quinoa:3.89
	[plant](taxid:3555)Beta vulgaris:2.02
	[plant](taxid:3562)Spinacia oleracea:1.63
	Other:11.93
Unknown_AV707-01T0012	[virus](taxid:112227)Cactus virus:69.89
	[virus](taxid:1176736)Pitaya virus:5.32
	[plant](taxid:63459)Chenopodium quinoa:3.6
	[plant](taxid:3555)Beta vulgaris:3.44
	[plant](taxid:3562)Spinacia oleracea:3.11
	[virus](taxid:2480180)Mytcor virus:1.23
	Other:13.26
Unknown_AV707-01T0013	[virus](taxid:112227)Cactus virus:72.14
	[virus](taxid:1176736)Pitaya virus:7.22
	[plant](taxid:63459)Chenopodium quinoa:3.14
	[plant](taxid:3555)Beta vulgaris:2.35
	[plant](taxid:3562)Spinacia oleracea:1.88
	Other:13.43
Unknown_AV707-01T0014	[virus](taxid:112227)Cactus virus:77.45
	[virus](taxid:1176736)Pitaya virus:5.34
	[plant](taxid:3562)Spinacia oleracea:2.31
	[plant](taxid:3555)Beta vulgaris:2.07
	[plant](taxid:63459)Chenopodium quinoa:1.91
	Other:10.96
Unknown_AV707-01T0015	[virus](taxid:112227)Cactus virus:71.82
	[virus](taxid:1176736)Pitaya virus:5.1
	[plant](taxid:3555)Beta vulgaris:3.08
	[plant](taxid:63459)Chenopodium quinoa:2.27
	[plant](taxid:3562)Spinacia oleracea:2.19
	Other:15.39
Unknown_AV707-01T0016	[virus](taxid:112227)Cactus virus:84.53
	[plant](taxid:3555)Beta vulgaris:2.07
	[plant](taxid:63459)Chenopodium quinoa:1.45
	Other:12.06
Unknown_AV707-01T0017	[virus](taxid:112227)Cactus virus:83.88
	[plant](taxid:63459)Chenopodium quinoa:2.67
	[plant](taxid:3555)Beta vulgaris:2.25
	[plant](taxid:3562)Spinacia oleracea:1.2
	[virus](taxid:1176736)Pitaya virus:1.13
	Other:8.82
Unknown_AV707-01T0018	[virus](taxid:112227)Cactus virus:81.78
	[plant](taxid:3555)Beta vulgaris:2.79
	[plant](taxid:63459)Chenopodium quinoa:2.79
	[plant](taxid:3562)Spinacia oleracea:1.09
	Other:11.72
Unknown_AV707-01T0019	[virus](taxid:112227)Cactus virus:74.6
	[plant](taxid:63459)Chenopodium quinoa:2.52
	[plant](taxid:3555)Beta vulgaris:2.44
	[virus](taxid:1176736)Pitaya virus:2.29
	[virus](taxid:2480180)Mytcor virus:1.68
	[virus](taxid:253701)Zygocactus virus:1.3
	[plant](taxid:3562)Spinacia oleracea:1.14
	Other:14.23
Unknown_AV707-01T0020	[virus](taxid:112227)Cactus virus:85.88
	[virus](taxid:1176736)Pitaya virus:3.15
	[plant](taxid:63459)Chenopodium quinoa:1.41
	Other:9.64000000000001
Unknown_AV707-01T0021	[virus](taxid:112227)Cactus virus:81.96
	[virus](taxid:253701)Zygocactus virus:3.46
	[plant](taxid:63459)Chenopodium quinoa:1.94
	[plant](taxid:3562)Spinacia oleracea:1.52
	[plant](taxid:3555)Beta vulgaris:1.31
	[virus](taxid:1176736)Pitaya virus:1.04
	Other:8.86000000000001
Unknown_AV707-01T0022	[virus](taxid:253700)Schlumbergera virus:51.92
	[virus](taxid:112227)Cactus virus:26.31
	[virus](taxid:253701)Zygocactus virus:3.14
	[virus](taxid:1176736)Pitaya virus:2.7
	[plant](taxid:3555)Beta vulgaris:2.35
	[plant](taxid:3562)Spinacia oleracea:2.26
	[plant](taxid:63459)Chenopodium quinoa:1.92
	[virus](taxid:2480180)Mytcor virus:1.05
	Other:8.42999999999999
Unknown_AV707-01T0023	[virus](taxid:253700)Schlumbergera virus:52.35
	[virus](taxid:112227)Cactus virus:25.59
	[virus](taxid:253701)Zygocactus virus:3.22
	[plant](taxid:63459)Chenopodium quinoa:2.43
	[virus](taxid:1176736)Pitaya virus:1.88
	[plant](taxid:3555)Beta vulgaris:1.88
	[plant](taxid:3562)Spinacia oleracea:1.33
	Other:11.43
Unknown_AV707-01T0024	[virus](taxid:253700)Schlumbergera virus:53.77
	[virus](taxid:112227)Cactus virus:24.94
	[virus](taxid:253701)Zygocactus virus:2.88
	[virus](taxid:1176736)Pitaya virus:2.63
	[plant](taxid:3555)Beta vulgaris:1.7
	[plant](taxid:3562)Spinacia oleracea:1.7
	[plant](taxid:63459)Chenopodium quinoa:1.7
	[virus](taxid:2480180)Mytcor virus:1.44
	Other:9.09
