# Supplementary material for: The Pitaya Flower Tissue’s Gene Differential Expression Analysis between Self-Incompatible and Self-Compatible Varieties for the Identification of Genes Involved in Self-Incompatibility Regulation
Source: Int J Mol Sci. 2023 Jul 13;24(14):11406. doi: 10.3390/ijms241411406 (PMC10379629; doi:10.3390/ijms241411406)
Supplement: Supplementary file 1 [file ijms-24-11406-s001.zip › Table S2 Viral contamination in samples.xlsx]

## Sheet: Sheet1
Table S2 Viral contamination in samples
sample_name	Percentage of viral contamination（%）
Unknown_AK745-01T0001-01-T00	60.4656
Unknown_AK745-01T0002-01-T00	47.7338
Unknown_AK745-01T0003-01-T00	47.8548
Unknown_AK745-01T0004-01-T00	33.4662
Unknown_AK745-01T0005-01-T00	56.1594
Unknown_AK745-01T0006-01-T00	35.3548
Unknown_AK745-01T0007-01-T00	58.667
Unknown_AK745-01T0008-01-T00	51.7465
Unknown_AK745-01T0009-01-T00	62.3016
Unknown_AK745-01T0010-01-T00	47.934
Unknown_AK745-01T0011-01-T00	38.5392
Unknown_AK745-01T0012-01-T00	41.2908
Unknown_AK745-01T0013-01-T00	72.12
Unknown_AK745-01T0014-01-T00	0.836
Unknown_AK745-01T0015-01-T00	65.0712
Unknown_AK745-01T0016-01-T00	25.227
Unknown_AK745-01T0017-01-T00	32.994
Unknown_AK745-01T0018-01-T00	37.4922
Unknown_AK745-01T0019-01-T00	35.0714
Unknown_AK745-01T0020-01-T00	23.3814
Unknown_AK745-01T0021-01-T00	27.72
Unknown_AK745-01T0022-01-T00	44.289
Unknown_AK745-01T0023-01-T00	57.668
Unknown_AK745-01T0024-01-T00	63
Unknown_AK745-01T0025-01-T00	32.5
Unknown_AK745-01T0026-01-T00	45.36
Unknown_AK745-01T0027-01-T00	52.8
Unknown_AK745-01T0028-01-T00	58.22
Unknown_AK745-01T0029-01-T00	45.24
Unknown_AK745-01T0030-01-T00	43.2
Unknown_AK745-01T0031-01-T00	\
Unknown_AK745-01T0032-01-T00	\
Unknown_AK745-01T0033-01-T00	3.5052
Unknown_AK745-01T0034-01-T00	\
Unknown_AK745-01T0035-01-T00	\
Unknown_AK745-01T0036-01-T00	\
