# Supplementary material for: The Pitaya Flower Tissue’s Gene Differential Expression Analysis between Self-Incompatible and Self-Compatible Varieties for the Identification of Genes Involved in Self-Incompatibility Regulation
Source: Int J Mol Sci. 2023 Jul 13;24(14):11406. doi: 10.3390/ijms241411406 (PMC10379629; doi:10.3390/ijms241411406)
Supplement: Supplementary file 1 [file ijms-24-11406-s001.zip › Table S3 Sequence comparison results of sample data and reference genome.xlsx]

## Sheet: Sheet1
Table S3 Sequence comparison results of sample data and reference genome
Sample	Clean reads	Clean bases	GC(%)	Q30(%)	Total Reads	Mapped Reads	Uniq Mapped Reads	MultiPle Map Reads	Reads Map to '+'	Reads Map to '-'
JP-1	21804352	6499176816	0.4599	0.9331	43608704	41,405,004 (94.95%)	37,608,661 (86.24%)	3,796,343 (8.71%)	23,873,755 (54.75%)	23,713,295 (54.38%)
JP-2	23675349	7056406782	0.4632	0.9438	47350698	45,081,485 (95.21%)	41,200,547 (87.01%)	3,880,938 (8.20%)	25,768,937 (54.42%)	25,643,412 (54.16%)
JP-3	21297239	6353304806	0.4634	0.9452	42594478	40,568,276 (95.24%)	37,123,362 (87.16%)	3,444,914 (8.09%)	23,134,132 (54.31%)	23,028,314 (54.06%)
CP-1	20113567	6000515598	0.4605	0.9443	40227134	39,127,037 (97.27%)	35,699,225 (88.74%)	3,427,812 (8.52%)	22,429,912 (55.76%)	22,353,174 (55.57%)
CP-2	19254321	5740420440	0.4628	0.9437	38508642	37,378,702 (97.07%)	34,219,186 (88.86%)	3,159,516 (8.20%)	21,309,162 (55.34%)	21,268,028 (55.23%)
CP-3	22823600	6796062816	0.4623	0.9447	45647200	44,337,537 (97.13%)	40,565,175 (88.87%)	3,772,362 (8.26%)	25,332,171 (55.50%)	25,284,043 (55.39%)
JS-1	9915654	2957206568	0.4736	0.9441	19831308	18,695,151 (94.27%)	17,290,443 (87.19%)	1,404,708 (7.08%)	10,258,681 (51.73%)	10,324,698 (52.06%)
JS-2	11210699	3350738824	0.4704	0.9431	22421398	21,029,506 (93.79%)	19,430,255 (86.66%)	1,599,251 (7.13%)	11,527,784 (51.41%)	11,575,183 (51.63%)
JS-3	10925855	3264975926	0.4704	0.9467	21851710	20,584,133 (94.20%)	19,057,648 (87.21%)	1,526,485 (6.99%)	11,270,013 (51.57%)	11,326,656 (51.83%)
CS-1	13852843	4140394758	0.4698	0.9412	27705686	26,848,396 (96.91%)	24,757,827 (89.36%)	2,090,569 (7.55%)	14,799,918 (53.42%)	14,947,945 (53.95%)
CS-2	11108987	3311101066	0.4719	0.9433	22217974	21,398,360 (96.31%)	19,835,659 (89.28%)	1,562,701 (7.03%)	11,710,293 (52.71%)	11,852,626 (53.35%)
CS-3	11274443	3369863100	0.4724	0.9419	22548886	21,821,150 (96.77%)	20,127,543 (89.26%)	1,693,607 (7.51%)	12,036,512 (53.38%)	12,140,814 (53.84%)
JSS1-1	13814898	4126352712	0.4689	0.9457	27629796	26,047,957 (94.27%)	24,129,364 (87.33%)	1,918,593 (6.94%)	14,363,471 (51.99%)	14,401,575 (52.12%)
JSS1-2	11048268	3294936816	0.4721	0.9442	22096536	20,709,931 (93.72%)	19,189,232 (86.84%)	1,520,699 (6.88%)	11,388,270 (51.54%)	11,471,480 (51.92%)
JSS1-3	12774221	3812222354	0.4691	0.9465	25548442	24,180,458 (94.65%)	22,321,645 (87.37%)	1,858,813 (7.28%)	13,381,795 (52.38%)	13,447,810 (52.64%)
JSS2-1	9396141	2803097360	0.4662	0.9445	18792282	17,733,048 (94.36%)	16,439,104 (87.48%)	1,293,944 (6.89%)	9,739,714 (51.83%)	9,766,573 (51.97%)
JSS2-2	9664859	2887198196	0.4681	0.9335	19329718	18,142,773 (93.86%)	16,840,305 (87.12%)	1,302,468 (6.74%)	9,943,367 (51.44%)	9,969,461 (51.58%)
JSS2-3	8593057	2561489938	0.4712	0.9436	17186114	16,111,615 (93.75%)	14,934,291 (86.90%)	1,177,324 (6.85%)	8,828,236 (51.37%)	8,877,152 (51.65%)
JSS3-1	10206429	3048530412	0.4667	0.9448	20412858	19,290,106 (94.50%)	17,888,032 (87.63%)	1,402,074 (6.87%)	10,613,992 (52.00%)	10,614,112 (52.00%)
JSS3-2	11243369	3356267176	0.4689	0.9425	22486738	21,274,754 (94.61%)	19,718,516 (87.69%)	1,556,238 (6.92%)	11,678,996 (51.94%)	11,706,351 (52.06%)
JSS3-3	11159405	3333931052	0.4674	0.9439	22318810	21,069,737 (94.40%)	19,513,044 (87.43%)	1,556,693 (6.97%)	11,590,396 (51.93%)	11,596,225 (51.96%)
JSS4-1	6398357	1909272058	0.4665	0.9488	12796714	12,112,963 (94.66%)	11,306,665 (88.36%)	806,298 (6.30%)	6,612,699 (51.67%)	6,603,133 (51.60%)
JSS4-2	3576275	1065327086	0.4728	0.9448	7152550	6,717,870 (93.92%)	6,251,890 (87.41%)	465,980 (6.51%)	3,665,257 (51.24%)	3,662,589 (51.21%)
JSS4-3	7616540	2273546872	0.4683	0.9454	15233080	14,446,433 (94.84%)	13,459,926 (88.36%)	986,507 (6.48%)	7,872,591 (51.68%)	7,869,716 (51.66%)
CSS1-1	9569428	2853030802	0.4705	0.9426	19138856	18,398,384 (96.13%)	17,053,360 (89.10%)	1,345,024 (7.03%)	10,128,741 (52.92%)	10,228,312 (53.44%)
CSS1-2	14822610	4432007210	0.4661	0.935	29645220	28,689,703 (96.78%)	26,518,499 (89.45%)	2,171,204 (7.32%)	15,847,618 (53.46%)	15,958,911 (53.83%)
CSS1-3	13263111	3964037598	0.4678	0.9408	26526222	25,633,329 (96.63%)	23,746,470 (89.52%)	1,886,859 (7.11%)	14,113,236 (53.20%)	14,219,701 (53.61%)
CSS2-1	9222469	2754730762	0.4675	0.9423	18444938	17,848,224 (96.76%)	16,472,534 (89.31%)	1,375,690 (7.46%)	9,888,307 (53.61%)	9,944,996 (53.92%)
CSS2-2	4570598	1363458396	0.4683	0.9429	9141196	8,795,977 (96.22%)	8,158,027 (89.24%)	637,950 (6.98%)	4,843,034 (52.98%)	4,861,480 (53.18%)
CSS2-3	7531198	2249241382	0.4692	0.9459	15062396	14,536,019 (96.51%)	13,461,732 (89.37%)	1,074,287 (7.13%)	7,990,860 (53.05%)	8,042,969 (53.40%)
CSS3-1	13338957	3990146010	0.4645	0.9402	26677914	25,829,411 (96.82%)	23,954,359 (89.79%)	1,875,052 (7.03%)	14,223,217 (53.31%)	14,298,663 (53.60%)
CSS3-2	6628602	1977853478	0.4692	0.9419	13257204	12,770,696 (96.33%)	11,805,025 (89.05%)	965,671 (7.28%)	7,060,294 (53.26%)	7,088,903 (53.47%)
CSS3-3	5170815	1541187130	0.4707	0.9461	10341630	9,932,076 (96.04%)	9,175,398 (88.72%)	756,678 (7.32%)	5,504,816 (53.23%)	5,520,591 (53.38%)
CSS4-1	8024240	2400842292	0.4654	0.9404	16048480	15,567,474 (97.00%)	14,470,385 (90.17%)	1,097,089 (6.84%)	8,490,104 (52.90%)	8,526,805 (53.13%)
CSS4-2	9337832	2791574246	0.4682	0.943	18675664	18,092,254 (96.88%)	16,804,133 (89.98%)	1,288,121 (6.90%)	9,890,717 (52.96%)	9,940,163 (53.23%)
CSS4-3	11374778	3400671558	0.4683	0.9373	22749556	22,069,293 (97.01%)	20,373,424 (89.56%)	1,695,869 (7.45%)	12,137,312 (53.35%)	12,197,583 (53.62%)
CSC1-1	13457404	4025851536	0.4589	0.9248	26914808	23,134,025 (85.95%)	21,628,721 (80.36%)	1,505,304 (5.59%)	12,588,005 (46.77%)	12,652,901 (47.01%)
CSC1-2	11750948	3515965658	0.4594	0.9252	23501896	19,721,607 (83.91%)	18,443,352 (78.48%)	1,278,255 (5.44%)	10,729,121 (45.65%)	10,789,788 (45.91%)
CSC1-3	8956322	2679753532	0.4629	0.9188	17912644	15,877,629 (88.64%)	14,841,784 (82.86%)	1,035,845 (5.78%)	8,638,066 (48.22%)	8,691,996 (48.52%)
CSC2-1	15478604	4627479394	0.4594	0.9211	30957208	26,726,268 (86.33%)	24,887,684 (80.39%)	1,838,584 (5.94%)	14,650,834 (47.33%)	14,694,095 (47.47%)
CSC2-2	14614475	4372665286	0.4677	0.9269	29228950	18,331,219 (62.72%)	17,116,188 (58.56%)	1,215,031 (4.16%)	9,978,929 (34.14%)	10,038,243 (34.34%)
CSC2-3	6694084	2001571268	0.4607	0.9259	13388168	11,938,981 (89.18%)	11,156,554 (83.33%)	782,427 (5.84%)	6,509,346 (48.62%)	6,540,580 (48.85%)
CSC3-1	8409447	2515714322	0.4615	0.9345	16818894	14,044,099 (83.50%)	13,100,040 (77.89%)	944,059 (5.61%)	7,688,222 (45.71%)	7,705,710 (45.82%)
CSC3-2	8689831	2599386254	0.462	0.9406	17379662	14,269,202 (82.10%)	13,296,338 (76.51%)	972,864 (5.60%)	7,828,522 (45.04%)	7,844,345 (45.14%)
CSC3-3	8673101	2592847954	0.4626	0.9447	17346202	14,341,536 (82.68%)	13,375,308 (77.11%)	966,228 (5.57%)	7,851,255 (45.26%)	7,875,012 (45.40%)
CSC4-1	6810607	2035720294	0.462	0.9214	13621214	11,245,580 (82.56%)	10,506,392 (77.13%)	739,188 (5.43%)	6,151,063 (45.16%)	6,156,711 (45.20%)
CSC4-2	6949840	2079242968	0.4634	0.9262	13899680	10,557,168 (75.95%)	9,880,574 (71.08%)	676,594 (4.87%)	5,753,507 (41.39%)	5,764,694 (41.47%)
CSC4-3	10345348	3094245406	0.4644	0.9244	20690696	16,885,985 (81.61%)	15,763,262 (76.19%)	1,122,723 (5.43%)	9,214,502 (44.53%)	9,235,546 (44.64%)
JSC1-1	9570589	2861742554	0.4604	0.9231	19141178	17,544,357 (91.66%)	16,377,803 (85.56%)	1,166,554 (6.09%)	9,602,513 (50.17%)	9,618,421 (50.25%)
JSC1-2	10554258	3156222582	0.4589	0.9179	21108516	19,206,790 (90.99%)	17,957,434 (85.07%)	1,249,356 (5.92%)	10,456,916 (49.54%)	10,482,783 (49.66%)
JSC1-3	10621189	3177355966	0.4618	0.918	21242378	19,100,612 (89.92%)	17,882,136 (84.18%)	1,218,476 (5.74%)	10,351,186 (48.73%)	10,390,985 (48.92%)
JSC2-1	11210403	3353979804	0.4582	0.9184	22420806	20,419,514 (91.07%)	19,015,320 (84.81%)	1,404,194 (6.26%)	11,211,172 (50.00%)	11,214,304 (50.02%)
JSC2-2	11646586	3484784762	0.4572	0.9245	23293172	21,403,194 (91.89%)	19,935,250 (85.58%)	1,467,944 (6.30%)	11,755,690 (50.47%)	11,761,158 (50.49%)
JSC2-3	10758652	3217677090	0.4588	0.9197	21517304	19,648,717 (91.32%)	18,309,685 (85.09%)	1,339,032 (6.22%)	10,762,176 (50.02%)	10,772,786 (50.07%)
JSC3-1	9758859	2918794040	0.4575	0.9217	19517718	17,990,329 (92.17%)	16,746,604 (85.80%)	1,243,725 (6.37%)	9,920,496 (50.83%)	9,915,126 (50.80%)
JSC3-2	8388927	2509191314	0.4573	0.9285	16777854	15,487,864 (92.31%)	14,429,844 (86.01%)	1,058,020 (6.31%)	8,514,948 (50.75%)	8,516,380 (50.76%)
JSC3-3	10138885	3032745100	0.4589	0.9283	20277770	18,798,350 (92.70%)	17,489,299 (86.25%)	1,309,051 (6.46%)	10,369,940 (51.14%)	10,367,877 (51.13%)
JSC4-1	9268865	2773768940	0.4579	0.9247	18537730	16,698,091 (90.08%)	15,583,987 (84.07%)	1,114,104 (6.01%)	9,147,599 (49.35%)	9,144,016 (49.33%)
JSC4-2	6567395	1964695820	0.4576	0.9245	13134790	12,038,719 (91.66%)	11,252,561 (85.67%)	786,158 (5.99%)	6,592,414 (50.19%)	6,590,541 (50.18%)
JSC4-3	6997394	2093195322	0.4605	0.9301	13994788	12,245,553 (87.50%)	11,450,986 (81.82%)	794,567 (5.68%)	6,671,440 (47.67%)	6,672,214 (47.68%)
