# Supplementary material for: The Pitaya Flower Tissue’s Gene Differential Expression Analysis between Self-Incompatible and Self-Compatible Varieties for the Identification of Genes Involved in Self-Incompatibility Regulation
Source: Int J Mol Sci. 2023 Jul 13;24(14):11406. doi: 10.3390/ijms241411406 (PMC10379629; doi:10.3390/ijms241411406)
Supplement: Supplementary file 1 [file ijms-24-11406-s001.zip › Table S4 Statistics on the number of AS events.xlsx]

## Sheet: Sheet1
Table S4 Statistics on the number of AS events
AS	XSKIP	XMSKIP	XMIR	XIR	XAE	TTS	TSS	SKIP	MSKIP	MIR	IR	AE
JP-1	284	41	0	46	308	13988	14084	1119	179	5	176	2604
JP-2	321	40	1	38	358	14481	14568	1264	208	10	201	2946
JP-3	325	49	6	35	308	14302	14405	1168	218	5	178	2680
CP-1	294	52	1	32	276	14369	14440	1317	289	10	181	2695
CP-2	281	57	3	49	284	14592	14590	1309	236	7	219	2773
CP-3	337	62	0	50	300	14708	14886	1392	243	10	200	3119
JS-1	320	35	9	104	488	18227	18487	1269	149	23	448	3836
JS-2	309	27	16	99	472	17892	18106	1124	123	21	375	3424
JS-3	314	39	4	77	372	18064	18258	1112	152	22	390	3613
CS-1	333	40	8	118	445	18305	18680	1446	211	24	444	3813
CS-2	340	36	8	148	470	18080	18236	1362	189	53	492	3992
CS-3	275	31	2	83	349	17761	17898	1232	170	23	339	3250
JSS1-1	335	14	7	87	454	18149	18436	1365	195	12	361	3553
JSS1-2	268	28	1	92	361	17807	18076	1133	146	17	345	3152
JSS1-3	304	21	3	63	342	17879	18059	1202	156	19	293	3164
JSS2-1	293	20	5	98	377	18160	18358	1220	112	26	422	3690
JSS2-2	334	25	9	109	447	18503	18756	1398	173	38	481	4060
JSS2-3	249	27	7	112	422	17948	18090	1078	109	20	427	3338
JSS3-1	329	23	2	95	496	18382	18653	1350	160	16	408	3942
JSS3-2	356	28	7	83	447	18469	18713	1292	175	20	418	3856
JSS3-3	332	17	4	138	511	18635	18852	1418	154	22	431	4090
JSS4-1	246	27	4	74	424	18511	18614	1024	141	18	423	3367
JSS4-2	103	13	2	30	201	16950	16991	571	67	10	229	2013
JSS4-3	269	27	9	75	372	18486	18507	1123	149	26	360	3721
CSS1-1	235	36	12	85	371	17948	18119	1132	127	25	358	3237
CSS1-2	301	34	1	62	318	18743	18952	1393	185	13	305	3486
CSS1-3	289	40	2	69	385	18380	18696	1263	167	10	327	3386
CSS2-1	246	34	3	80	393	18423	18703	1243	129	29	417	3490
CSS2-2	159	22	5	51	259	17269	17467	797	81	17	318	2491
CSS2-3	253	26	4	76	333	18094	18268	1156	147	38	405	3395
CSS3-1	316	42	11	103	407	19063	19221	1519	209	36	430	4060
CSS3-2	221	34	0	60	256	17983	18079	1002	112	18	360	2897
CSS3-3	171	27	4	53	234	17547	17624	891	91	24	288	2666
CSS4-1	263	43	2	88	348	18734	18693	1315	197	25	423	3816
CSS4-2	236	37	1	57	333	18760	18675	1258	165	18	314	3342
CSS4-3	291	43	5	84	401	19087	19100	1478	224	24	419	3957
JSC1-1	300	21	6	91	367	17258	17510	1205	174	44	425	3473
JSC1-2	303	31	8	108	385	17492	17793	1241	193	60	478	3872
JSC1-3	332	33	15	131	525	17902	18307	1408	185	66	532	4086
JSC2-1	271	33	7	111	416	17729	18103	1236	163	47	464	3674
JSC2-2	294	28	13	124	438	17565	17919	1205	168	33	453	3546
JSC2-3	283	18	11	123	425	17705	18175	1320	162	51	517	3900
JSC3-1	255	37	9	110	379	17078	17304	1156	168	29	427	3281
JSC3-2	255	27	17	96	373	17174	17542	1055	143	39	439	3090
JSC3-3	273	30	3	115	373	17543	17713	1224	166	29	405	3481
JSC4-1	296	29	11	124	428	18203	18508	1327	172	44	505	3866
JSC4-2	220	20	9	70	327	17601	17843	941	130	37	421	3090
JSC4-3	242	19	6	107	386	17906	18184	1017	139	44	496	3438
CSC1-1	292	29	18	158	435	17875	18201	1369	192	72	551	4178
CSC1-2	288	31	6	115	349	17911	18140	1322	151	48	466	3876
CSC1-3	246	29	6	86	319	17229	17436	1052	128	32	396	3149
CSC2-1	347	51	18	147	451	18089	18399	1485	218	62	613	4335
CSC2-2	287	23	21	151	396	17829	18223	1243	140	81	605	3835
CSC2-3	181	20	3	105	318	16288	16524	916	106	50	408	2784
CSC3-1	212	24	10	98	313	17468	17699	1002	136	44	487	3215
CSC3-2	216	22	4	130	319	17586	17792	960	112	31	482	3221
CSC3-3	231	26	7	118	380	17391	17767	971	114	43	473	3164
CSC4-1	199	17	3	80	257	17167	17294	878	105	22	372	2693
CSC4-2	193	16	8	86	306	17205	17369	929	100	26	431	2886
CSC4-3	312	22	4	136	434	18613	18867	1392	136	53	595	4007
