# Supplementary material for: The Pitaya Flower Tissue’s Gene Differential Expression Analysis between Self-Incompatible and Self-Compatible Varieties for the Identification of Genes Involved in Self-Incompatibility Regulation
Source: Int J Mol Sci. 2023 Jul 13;24(14):11406. doi: 10.3390/ijms241411406 (PMC10379629; doi:10.3390/ijms241411406)
Supplement: Supplementary file 1 [file ijms-24-11406-s001.zip › Table S5 DEGs in module mediumpurple3.xlsx]

## Sheet: Table S8 mediumpurple3.KEGG
Table S5 DEGs in module mediumpurple3
#kMap	KPid	mNum	nNum	MNum	NNum	KIDs
Phagosome	ko04145	4	127	239	9886	HU03G00662;HU04G01340;HU08G01272;HU08G01545
Flavonoid biosynthesis	ko00941	1	113	239	9886	HU03G00726
Inositol phosphate metabolism	ko00562	2	163	239	9886	HU07G02261;HU11G01334
Amino sugar and nucleotide sugar metabolism	ko00520	3	324	239	9886	HU05G00866;HU05G01623;Hylocereus_polyrhizus_newGene_7686
Protein processing in endoplasmic reticulum	ko04141	26	469	239	9886	HU01G02389;HU02G00099;HU02G00574;HU02G00577;HU02G01430;HU02G01512;HU04G01340;HU05G01536;HU05G01539;HU05G01541;HU05G01542;HU05G01545;HU06G00509;HU06G01689;HU06G02230;HU07G00259;HU07G01656;HU07G02085;HU07G02127;HU08G00326;HU08G01545;HU08G01831;HU09G00069;HU09G00189;HU09G00205;HU09G02098
Arachidonic acid metabolism	ko00590	1	38	239	9886	HU04G01183
Isoquinoline alkaloid biosynthesis	ko00950	2	66	239	9886	HU05G00517;Hylocereus_polyrhizus_newGene_14426
Ether lipid metabolism	ko00565	1	51	239	9886	HU11G01334
Mannose type O-glycan biosynthesis	ko00515	2	11	239	9886	HU08G00211;HU08G00225
Pentose phosphate pathway	ko00030	2	77	239	9886	HU02G02415;HU04G00483
Plant hormone signal transduction	ko04075	6	653	239	9886	HU02G00106;HU03G00685;HU03G01361;HU07G02239;HU08G01627;HU11G01879
Purine metabolism	ko00230	3	174	239	9886	HU04G00483;HU05G00042;HU07G00626
Starch and sucrose metabolism	ko00500	2	384	239	9886	HU03G00894;HU03G00958
Peroxisome	ko04146	2	138	239	9886	HU05G00140;HU10G01188
Stilbenoid, diarylheptanoid and gingerol biosynthesis	ko00945	1	53	239	9886	HU03G00726
Benzoxazinoid biosynthesis	ko00402	1	20	239	9886	HU02G03367
Pyrimidine metabolism	ko00240	2	116	239	9886	HU05G00042;HU07G00626
Glycerophospholipid metabolism	ko00564	2	191	239	9886	HU08G00590;HU11G01334
Tropane, piperidine and pyridine alkaloid biosynthesis	ko00960	2	56	239	9886	HU05G00517;HU05G01577
Glutathione metabolism	ko00480	2	116	239	9886	HU04G01183;HU08G01819
Diterpenoid biosynthesis	ko00904	1	58	239	9886	HU06G02456
Glycerolipid metabolism	ko00561	1	193	239	9886	HU08G00590
RNA degradation	ko03018	6	202	239	9886	HU01G00501;HU02G02415;HU08G01559;HU08G01613;HU09G01703;HU10G00838
ABC transporters	ko02010	1	113	239	9886	HU07G01610
Circadian rhythm - plant	ko04712	1	142	239	9886	HU07G01374
Galactose metabolism	ko00052	2	255	239	9886	HU02G02415;Hylocereus_polyrhizus_newGene_7686
Carbon metabolism	ko01200	6	384	239	9886	HU02G02415;HU03G00758;HU04G00483;HU06G00028;HU06G00421;HU07G02261
DNA replication	ko03030	2	82	239	9886	HU02G00201;HU09G00998
Plant-pathogen interaction	ko04626	9	789	239	9886	HU02G00813;HU02G01165;HU02G01295;HU02G01724;HU02G01898;HU02G02696;HU08G00326;HU09G00346;HU0G00203
Isoflavonoid biosynthesis	ko00943	1	19	239	9886	HU02G01238
Ribosome	ko03010	100	427	239	9886	HU01G00590;HU01G00862;HU01G00890;HU01G01506;HU01G01848;HU01G02418;HU01G02648;HU02G00314;HU02G00779;HU02G00884;HU02G00898;HU02G01052;HU02G01454;HU02G01739;HU02G02214;HU02G03032;HU02G03155;HU02G03478;HU03G01423;HU03G02688;HU04G00380;HU04G00604;HU04G00635;HU04G01502;HU04G01636;HU04G01657;HU04G01682;HU04G01722;HU04G01995;HU05G00179;HU05G00457;HU05G00710;HU05G01136;HU05G01504;HU05G01682;HU05G01780;HU0…
Proteasome	ko03050	1	94	239	9886	HU11G00930
Ubiquitin mediated proteolysis	ko04120	4	256	239	9886	HU04G01722;HU08G01846;HU08G02327;HU11G01662
Cyanoamino acid metabolism	ko00460	1	106	239	9886	HU04G01460
Tyrosine metabolism	ko00350	2	83	239	9886	HU05G00517;HU11G00464
Fatty acid metabolism	ko01212	1	107	239	9886	HU07G02312
Monoterpenoid biosynthesis	ko00902	1	37	239	9886	HU07G00510
Endocytosis	ko04144	6	355	239	9886	HU02G01512;HU03G00662;HU06G01689;HU06G02208;HU07G00259;HU07G02085
Mismatch repair	ko03430	2	76	239	9886	HU02G00201;HU09G00998
Base excision repair	ko03410	1	73	239	9886	HU09G01391
Glyoxylate and dicarboxylate metabolism	ko00630	2	128	239	9886	HU02G02769;HU06G00421
Biosynthesis of amino acids	ko01230	5	328	239	9886	HU02G02415;HU03G00758;HU04G00483;HU06G02232;HU07G02261
Photosynthesis	ko00195	3	137	239	9886	HU01G01451;HU07G01547;Hylocereus_polyrhizus_newGene_18
beta-Alanine metabolism	ko00410	1	73	239	9886	HU05G00517
Folate biosynthesis	ko00790	1	44	239	9886	HU04G00133
Histidine metabolism	ko00340	1	39	239	9886	HU06G02232
Ascorbate and aldarate metabolism	ko00053	1	205	239	9886	Hylocereus_polyrhizus_newGene_7686
Citrate cycle (TCA cycle)	ko00020	1	70	239	9886	HU06G00028
Pentose and glucuronate interconversions	ko00040	6	364	239	9886	HU04G01689;HU05G00504;HU10G00309;Hylocereus_polyrhizus_newGene_11246;Hylocereus_polyrhizus_newGene_6769;Hylocereus_polyrhizus_newGene_7686
mRNA surveillance pathway	ko03015	2	166	239	9886	HU02G01805;HU07G00521
Ribosome biogenesis in eukaryotes	ko03008	6	157	239	9886	HU03G02759;HU07G01329;HU11G00132;HU11G00786;HU11G00818;Hylocereus_polyrhizus_newGene_3015
Glycine, serine and threonine metabolism	ko00260	3	114	239	9886	HU03G00758;HU05G00517;HU06G00421
Homologous recombination	ko03440	5	140	239	9886	HU02G00201;HU03G00717;HU03G02525;HU09G00998;Hylocereus_polyrhizus_newGene_5112
Basal transcription factors	ko03022	1	76	239	9886	HU01G02760
Cysteine and methionine metabolism	ko00270	3	167	239	9886	HU02G02438;HU07G00868;HU10G00748
Glycolysis / Gluconeogenesis	ko00010	3	207	239	9886	HU02G02415;HU03G00758;HU07G02261
Thiamine metabolism	ko00730	1	40	239	9886	HU02G00068
Nucleotide excision repair	ko03420	2	106	239	9886	HU02G00201;HU09G00998
Vitamin B6 metabolism	ko00750	3	19	239	9886	HU01G00883;HU02G02897;HU03G01788
Biosynthesis of unsaturated fatty acids	ko01040	1	37	239	9886	HU07G02312
MAPK signaling pathway - plant	ko04016	4	475	239	9886	HU05G00042;HU05G00866;HU07G00626;HU11G01879
Fatty acid elongation	ko00062	1	64	239	9886	HU07G02312
RNA polymerase	ko03020	3	93	239	9886	HU02G00060;HU06G02221;HU10G01077
Spliceosome	ko03040	10	390	239	9886	HU02G01512;HU03G02759;HU06G01689;HU07G00259;HU07G01456;HU07G02085;HU08G01613;HU09G01004;HU09G02057;HU11G00818
Porphyrin and chlorophyll metabolism	ko00860	3	88	239	9886	HU02G01270;HU03G00020;HU08G00763
Oxidative phosphorylation	ko00190	2	221	239	9886	HU06G00028;HU10G00826
Carbon fixation in photosynthetic organisms	ko00710	1	113	239	9886	HU07G02261
RNA transport	ko03013	9	350	239	9886	HU02G01430;HU02G01930;HU02G02948;HU03G02237;HU05G00978;HU05G00979;HU07G00521;HU11G00132;HU11G00786
Phenylalanine metabolism	ko00360	2	65	239	9886	HU05G00517;HU11G00464
Phenylpropanoid biosynthesis	ko00940	4	353	239	9886	HU01G01049;HU03G00726;HU03G02902;HU08G01214
Glycosylphosphatidylinositol (GPI)-anchor biosynthesis	ko00563	2	47	239	9886	HU05G00593;HU05G00598
Fructose and mannose metabolism	ko00051	3	105	239	9886	HU02G02415;HU05G01623;HU07G02261
Alanine, aspartate and glutamate metabolism	ko00250	1	69	239	9886	HU04G01460
