# Supplementary material for: The Pitaya Flower Tissue’s Gene Differential Expression Analysis between Self-Incompatible and Self-Compatible Varieties for the Identification of Genes Involved in Self-Incompatibility Regulation
Source: Int J Mol Sci. 2023 Jul 13;24(14):11406. doi: 10.3390/ijms241411406 (PMC10379629; doi:10.3390/ijms241411406)
Supplement: Supplementary file 1 [file ijms-24-11406-s001.zip › Table S6 Sample collection.xlsx]

## Sheet: Sheet1
Table S6 Sample collection
No.	Tissue	Variety	Sample	Development Stage	Biological Repetition
1	Stigma	Jindu No.1	JS	before pollination	3
2	Stigma	Jindu No.1	JSS1	0.5h after self-pollination	3
3	Stigma	Jindu No.1	JSC1	0.5h after cross-pollination	3
4	Stigma	Jindu No.1	JSS2	2h after self-pollination	3
5	Stigma	Jindu No.1	JSC2	2h after cross-pollination	3
6	Stigma	Jindu No.1	JSS3	4h after self-pollination	3
7	Stigma	Jindu No.1	JSC3	4h after cross-pollination	3
8	Stigma	Jindu No.1	JSS4	12h after self-pollination	3
9	Stigma	Jindu No.1	JSC4	12h after cross-pollination	3
10	Stigma	Cu Sha	CS	before pollination	3
11	Stigma	Cu Sha	CSS1	0.5h after self-pollination	3
12	Stigma	Cu Sha	CSC1	0.5h after cross-pollination	3
13	Stigma	Cu Sha	CSS2	2h after self-pollination	3
14	Stigma	Cu Sha	CSC2	2h after cross-pollination	3
15	Stigma	Cu Sha	CSS3	4h after self-pollination	3
16	Stigma	Cu Sha	CSC3	4h after cross-pollination	3
17	Stigma	Cu Sha	CSS4	12h after self-pollination	3
18	Stigma	Cu Sha	CSC4	12h after cross-pollination	3
19	Pollen	Jindu No.1	JP	before pollination	3
20	Pollen	Cu Sha	CP	before pollination	3
