# Supplementary material for: The Pitaya Flower Tissue’s Gene Differential Expression Analysis between Self-Incompatible and Self-Compatible Varieties for the Identification of Genes Involved in Self-Incompatibility Regulation
Source: Int J Mol Sci. 2023 Jul 13;24(14):11406. doi: 10.3390/ijms241411406 (PMC10379629; doi:10.3390/ijms241411406)
Supplement: Supplementary file 1 [file ijms-24-11406-s001.zip › Table S7 Primer sequences for RT-qPCR.xlsx]

## Sheet: Sheet1
Table S7 Primer sequences for RT-qPCR
NO.	Gene ID	Gene Name	Forward Primer	Reverse Primer
1	HU11G00712	F-box1	GCTTGCCTGTCAAACCTCTTAT	AAGCAGCTTCCTGTTATCCCTA
2	HU11G00714	F-box2	CATTGGTCATGCGAGTGGG	CGATTGGGCTGAGAAGAGGTT
3	HU11G00715	F-box3	CAACATAATAGCGGGAATGCG	CAATAGGGATCAACCGAGGAA
4	HU01G01021	S-Kinase	GGGTGTATGATGTGGACAAAGG	CAGGGAGGGAGACTAAGCATTT
5	HU04G01342	RIP	AGGCTCGGTTGCTTCTCA	CTCCAAATCAATCGCTCT
6	HU10G00362	R1	CAAATAGGGAGGAAGTTCTGGG	GGTTGATTGCGGCTTGGA
7	HU10G00364	R2	AGAGCCAGATTTGGCAGATTAC	CACAAGAACCACGTCCCTTTG
8	Hylocereus_polyrhizus_newGene_13356	S-RNase2	GGTATCGTCCCTAGTTCTTCCC	CAACGCAAATCCTAATCTCCA
