# Supplementary figures and images for: The Pitaya Flower Tissue’s Gene Differential Expression Analysis between Self-Incompatible and Self-Compatible Varieties for the Identification of Genes Involved in Self-Incompatibility Regulation
Source: MDPI journal article supplement (doi:10.3390/ijms241411406), 2023-07-13

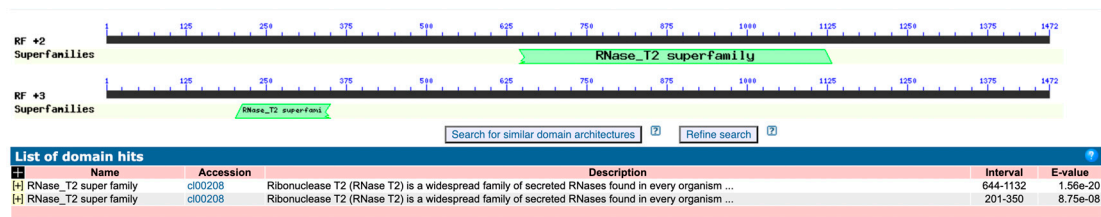

Figure S2 Conserved region of S-RNase2. The presence of two RNase-T2 regions in S-RNase2.

Supplement: s1 [file s1]
